# Supplementary material for: Drosophila hamlet mediates epithelial tissue assembly of the reproductive system
Source: eLife. 2025 Jul 4;13:RP104164. doi: 10.7554/eLife.104164 (PMC12227202; doi:10.7554/eLife.104164)
Supplement: Figure 1—figure supplement 2—source data 1. [file elife-104164-fig1-figsupp2-data1.xlsx]

## Sheet: Figure1-figure supplement 2B
		Number of progenies
	Genotypes	W1118	hamPRΔ	hamPRΔ/Df
Replicates	1	119	0	0
	2	115	9	0
	3	103	4	0
	4	117	36	0
	5	133	8	0
	6	99	29	0
	7	145	0	0
	8	98	10	0
	9	133	6	0
	10	118	30	0
	11		0	0
	12		0	0
	13		1	0
	14		0	0
	15		0	0
	16		7	0
	17		0	0
	18		5	0
	19		0	0
