# Supplementary material for: Drosophila hamlet mediates epithelial tissue assembly of the reproductive system
Source: eLife. 2025 Jul 4;13:RP104164. doi: 10.7554/eLife.104164 (PMC12227202; doi:10.7554/eLife.104164)
Supplement: Figure 1—source data 1. [file elife-104164-fig1-data1.xlsx]

## Sheet: Figure 1C
		Number of progenies
	Genotypes	W1118	hamPRΔ	hamPRΔ/Df	hamPRΔ; ham.sfGFP	hamPRΔ/Df; ham.sfGFP	hamSk1/Df; ham.sfGFP
Replicates	1	136	1	0	117	10	47
	2	127	67	0	62	0	0
	3	103	0	0	0	0	0
	4	101	0	0	199	167	0
	5	123	0	0	163	139	0
	6	121	0	0	0	178	0
	7	85	0	0	0	150	0
	8	114	0	0	123	170	6
	9	102	0	0	84	0	41
	10	97	100	0	151	0	10
	11		0	0		0	0
	12		0	0		67	0
	13		0	0		0	0
	14		0	0		51	0
	15		0	0		86	0
	16		0			8	141
	17		0			27	0
	18		0			55	0
	19					77	103
	20					112	0
	21					58	0
	22					2	107
	23					45
	24					47
	25					115
	26					109
	27					87
	28					34
	29					75
	30					19
	31					0
	32					0
	33					0
	34					0
	35					0
	36					0
	37					0
	38					0
	39					0
	40					0
	41					0
	42					0
	43					0
	44					0
	45					0
	46					0
	47					0
	48					0
	49					0
	50					0
	51					0
	52					0
	53					0
	54					0
	55					0
	56					0
