# Supplementary material for: Drosophila hamlet mediates epithelial tissue assembly of the reproductive system
Source: eLife. 2025 Jul 4;13:RP104164. doi: 10.7554/eLife.104164 (PMC12227202; doi:10.7554/eLife.104164)
Supplement: Figure 2—figure supplement 3—source data 1. [file elife-104164-fig2-figsupp3-data1.xlsx]

## Sheet: Figure2-figure supplement 3C
	number of myotubes	Average per sample			number of myotubes	Average per sample
wt_Te1_1	30	28.5		hamPRΔ/Df_Te1_1	25	23
wt_Te1_2	27			hamPRΔ/Df_Te1_2	21
wt_Te2_1	31	29.5		hamPRΔ/Df_Te2_1	31	26
wt_Te2_2	28			hamPRΔ/Df_Te2_2	21
wt_Te3_1	30	30.5		hamPRΔ/Df_Te3_1	30	25
wt_Te3_2	31			hamPRΔ/Df_Te3_2	20
wt_Te4_1	25	30		hamPRΔ/Df_Te4_1	22	21.5
wt_Te4_2	35			hamPRΔ/Df_Te4_2	21
wt_Te5_1	28	30.5		hamPRΔ/Df_Te5_1	19	22
wt_Te5_2	33			hamPRΔ/Df_Te5_2	25
