# Supplementary material for: Drosophila hamlet mediates epithelial tissue assembly of the reproductive system
Source: eLife. 2025 Jul 4;13:RP104164. doi: 10.7554/eLife.104164 (PMC12227202; doi:10.7554/eLife.104164)
Supplement: Figure 2—source data 1. [file elife-104164-fig2-data1.xlsx]

## Sheet: Figure 2C
Raw data: hamv5 vs hamPRΔ			relative intensity
	RawIntDen	Length	RawIntDen/Length	background subtration	Average per sample
hamv5_SV1_a	36528	21.19	1723.83	1484.09	1341.21
hamv5_SV1_a_background	4329	18.057	239.741
hamv5_SV1_b	24634	20.033	1229.67	1198.33
hamv5_SV1_b_background	590	18.826	31.3396
hamv5_SV2_a	24635	25.825	953.921	951.13	1090.29
hamv5_SV2_a_background	72	25.799	2.79081
hamv5_SV2_b	35050	27.795	1261.02	1229.45
hamv5_SV2_b_background	755	23.913	31.5728
hamv5_SV3_a	16299	25.447	640.508	640.332	759.302
hamv5_SV3_a_background	4	22.754	0.175793
hamv5_SV3_b	18193	20.632	881.786	878.272
hamv5_SV3_b_background	68	19.355	3.5133
hamv5_SV4_a	23600	22.775	1036.22	1035.37	993.87
hamv5_SV4_a_background	19	22.215	0.855278
hamv5_SV4_b	24930	25.936	961.212	952.371
hamv5_SV4_b_background	204	23.075	8.84074
hamv5_SV5_a	50702	43.421	1167.68	1166.7	1007.98
hamv5_SV5_a_background	38	38.773	0.980063
hamv5_SV5_b	28174	33.092	851.384	849.265
hamv5_SV5_b_background	69	32.567	2.11871
hamPRΔ_SV1_a	3799	46.772	81.2238	81.2238	74.7467
hamPRΔ_SV1_a_background	0	42.048	0
hamPRΔ_SV1_b	1871	27.391	68.3071	68.2695
hamPRΔ_SV1_b_background	1	26.605	0.0375869
hamPRΔ_SV2_a	1391	21.429	64.912	64.912	43.7773
hamPRΔ_SV2_a_background	0	18.485	0
hamPRΔ_SV2_b	851	37.584	22.6426	22.6426
hamPRΔ_SV2_b_background	0	37.337	0
hamPRΔ_SV3_a	4552	33.879	134.361	133.236	95.9789
hamPRΔ_SV3_a_background	33	29.333	1.12501
hamPRΔ_SV3_b	2320	39.508	58.7223	58.7223
hamPRΔ_SV3_b_background	0	37.611	0
hamPRΔ_SV4_a	4208	38.515	109.256	109.201	113.117
hamPRΔ_SV4_a_background	2	36.604	0.0546388
hamPRΔ_SV4_b	3466	28.984	119.583	117.033
hamPRΔ_SV4_b_background	76	29.803	2.55008
hamPRΔ_SV5_a	2671	59.326	45.0224	45.0224	66.7741
hamPRΔ_SV5_a_background	0	57.557	0
hamPRΔ_SV5_b	1849	20.825	88.7875	88.5258
hamPRΔ_SV5_b_background	5	19.102	0.261753
Average intensity per sample
	SV1	SV2	SV3	SV4	SV5	Average
hamv5	1341.21	1090.29	759.302	993.87	1007.98	1038.53
hamPRΔ	74.7467	43.7773	95.9789	113.117	66.7741
nomalize to hamv5_average
	SV1	SV2	SV3	SV4	SV5	STDEV	TTEST
hamv5	1.29145	1.04984	0.731131	0.956996	0.970587	0.201514	7.47874e-06
hamPRΔ	0.0719734	0.0421531	0.0924179	0.10892	0.0642967	0.0257492
