# Supplementary material for: Drosophila hamlet mediates epithelial tissue assembly of the reproductive system
Source: eLife. 2025 Jul 4;13:RP104164. doi: 10.7554/eLife.104164 (PMC12227202; doi:10.7554/eLife.104164)
Supplement: Figure 2—source data 2. [file elife-104164-fig2-data2.xlsx]

## Sheet: Figure 2D
Raw data: hamv5 vs hamPRΔ /Df
	RawIntDen	Length	relative intensity	background subtraction	Average per sample
hamv5_SV1_a	75778	39.644	1911.46	1703.63	1931.86
hamv5_SV1_a_background	7331	35.274	207.83
hamv5_SV1_b	108632	36.754	2955.65	2160.08
hamv5_SV1_b_background	28588	35.934	795.57
hamv5_SV2_a	80686	57.078	1413.61	1278.84	1440.61
hamv5_SV2_a_background	7134	52.934	134.772
hamv5_SV2_b	92909	51.296	1811.23	1602.38
hamv5_SV2_b_background	11211	53.679	208.853
hamv5_SV3_a	164425	44.342	3708.11	3542.2	4479.85
hamv5_SV3_a_background	6240	37.61	165.913
hamv5_SV3_b	210288	36.313	5790.98	5417.5
hamv5_SV3_b_background	13019	34.858	373.487
hamv5_SV4_a	173603	55.924	3104.27	2975.33	3872.23
hamv5_SV4_a_background	6393	49.582	128.938
hamv5_SV4_b	253339	49.446	5123.55	4769.13
hamv5_SV4_b_background	18198	51.346	354.419
hamPRΔ /Df_SV1_a	58206	43.674	1332.74	1304.91	1178.72
hamPRΔ /Df_SV1_a_background	1145	41.148	27.8264
hamPRΔ /Df_SV1_b	67743	57.734	1173.36	1052.52
hamPRΔ /Df_SV1_b_background	6513	53.897	120.842
hamPRΔ /Df_SV2_a	59454	40.602	1464.31	1340.17	1268.66
hamPRΔ /Df_SV2_a_background	4806	38.714	124.141
hamPRΔ /Df_SV2_b	64385	50.648	1271.22	1197.15
hamPRΔ /Df_SV2_b_background	3400	45.902	74.0708
hamPRΔ /Df_SV3_a	72022	56.74	1269.33	798.341	800.855
hamPRΔ /Df_SV3_a_background	24153	51.281	470.993
hamPRΔ /Df_SV3_b	78028	56.907	1371.15	803.37
hamPRΔ /Df_SV3_b_background	31761	55.939	567.779
hamPRΔ /Df_SV4_a	24743	43.69	566.331	557.221	364.287
hamPRΔ /Df_SV4_a_background	376	41.274	9.10985
hamPRΔ /Df_SV4_b	10678	47.607	224.295	171.353
hamPRΔ /Df_SV4_b_background	2198	41.517	52.9422
Average intensity per sample	SV1	SV2	SV3	SV4	Average
hamv5	1931.86	1440.61	4479.85	3872.23	2931.14
hamPRΔ /Df	1178.72	1268.66	800.855	364.287
nomalize to hamv5_average	SV1	SV2	SV3	SV4	STDEV	TTEST
hamv5	0.659081	0.491485	1.52837	1.32107	0.50235	0.0379025
hamPRΔ /Df	0.402137	0.432823	0.273224	0.124282	0.140717
