# Supplementary material for: Drosophila hamlet mediates epithelial tissue assembly of the reproductive system
Source: eLife. 2025 Jul 4;13:RP104164. doi: 10.7554/eLife.104164 (PMC12227202; doi:10.7554/eLife.104164)
Supplement: Figure 2—source data 3. [file elife-104164-fig2-data3.xlsx]

## Sheet: Figure 2E
Raw data: hamv5 vs hamPRΔ
	individual cell	Cor_Length	Average length per sample				individual cell	Cor_Length	Average length per sample
hamv5_SV1	1	3.27	3.1635			hamPRΔ _SV1	1	1.892	1.7101
	2	2.971					2	2.354
	3	3.023					3	2.494
	4	2.367					4	2.172
	5	2.948					5	1.401
	6	2.975					6	1.347
	7	3.117					7	1.772
	8	3.706					8	1.053
	9	3.728					9	1.287
	10	3.53					10	1.329
hamv5_SV2	1	4.067	3.7926			hamPRΔ _SV2	1	1.582	2.2054
	2	4.122					2	1.942
	3	2.77					3	2.06
	4	3.927					4	1.926
	5	4.214					5	2.052
	6	4.134					6	2.451
	7	3.351					7	2.46
	8	3.398					8	2.583
	9	3.661					9	2.561
	10	4.282					10	2.437
hamv5_SV3	1	4.92	4.1776			hamPRΔ _SV3	1	1.61	1.4955
	2	4.277					2	1.384
	3	4.624					3	1.416
	4	4.642					4	1.748
	5	3.449					5	1.532
	6	3.823					6	1.658
	7	3.653					7	1.587
	8	4.192					8	1.205
	9	4.221					9	1.307
	10	3.975					10	1.508
hamv5_SV4	1	3.189	3.6845			hamPRΔ _SV4	1	1.395	1.6221
	2	3.543					2	1.401
	3	3.039					3	2.239
	4	3.466					4	1.456
	5	2.703					5	1.462
	6	3.108					6	1.676
	7	3.329					7	2.226
	8	4.9					8	1.401
	9	5.493					9	1.582
	10	4.075					10	1.383
hamv5_SV5	1	3.737	4.0485			hamPRΔ _SV5	1	2.199	1.3387
	2	3.715					2	1.472
	3	3.55					3	0.98
	4	5.659					4	0.921
	5	2.994					5	1.129
	6	3.737					6	1.55
	7	4.17					7	1.156
	8	4.259					8	1.226
	9	5.13					9	1.624
	10	3.534					10	1.13
hamv5_SV6	1	3.546	3.5297			hamPRΔ _SV6	1	2.234	1.862
	2	4.064					2	2.676
	3	3.258					3	1.585
	4	4.081					4	1.964
	5	3.414					5	1.444
	6	3.913					6	1.755
	7	3.924					7	1.612
	8	3.529					8	1.702
	9	2.79					9	1.684
	10	2.778					10	1.964
Average_Cor signal length
	SV1	SV2	SV3	SV4	SV5	SV6	Average
hamv5	3.1635	3.7926	4.1776	3.6845	4.0485	3.5297	3.73273
hamPRΔ	1.7101	2.2054	1.4955	1.6221	1.3387	1.862
Normalize to hamv5_average
	SV1	SV2	SV3	SV4	SV5	SV6	STDEV	TTEST
hamv5	0.847502	1.01604	1.11918	0.987078	1.08459	0.945607	0.0979778
hamPRΔ	0.458136	0.590827	0.400645	0.434561	0.358638	0.49883	0.0812591	1.06001e-06
