# Supplementary material for: Drosophila hamlet mediates epithelial tissue assembly of the reproductive system
Source: eLife. 2025 Jul 4;13:RP104164. doi: 10.7554/eLife.104164 (PMC12227202; doi:10.7554/eLife.104164)
Supplement: Figure 2—source data 4. [file elife-104164-fig2-data4.xlsx]

## Sheet: Figure 2F
	cell-cell junction	RawIntDen	Length	RawIntDen/Length	background subtraction	average per sample
TE1_wt	1	2533129	7.419	341438	216296	233346
	1_backgroud	931807	7.446	125142
	2	1464584	4.804	304868	199452
	2_backgroud	436633	4.142	105416
	3	1694046	4.428	382576	283160
	3_backgroud	355312	3.574	99415.8
	4	1891356	5.604	337501	235379
	4_backgroud	574843	5.629	102122
	5	1832308	5.649	324360	232445
	5_backgroud	413708	4.501	91914.7
TE1_hamSk1	1	1250153	6.128	204007	77051.7	102320
	1_backgroud	738243	5.815	126955
	2	710111	2.729	260209	93529.7
	2_backgroud	401531	2.409	166680
	3	792946	3.485	227531	109442
	3_backgroud	380719	3.224	118089
	4	970106	4.38	221485	96063.1
	4_backgroud	524265	4.18	125422
	5	1315966	5.968	220504	135511
	5_backgroud	372776	4.386	84992.2
TE2_wt	1	1164991	3.809	305852	204216	201974
	1_backgroud	288545	2.839	101636
	2	931415	3.731	249642	114595
	2_backgroud	457945	3.391	135047
	3	1470733	5.344	275212	186870
	3_backgroud	396833	4.492	88342.2
	4	1055855	2.941	359012	249644
	4_backgroud	294639	2.694	109369
	5	1276966	3.68	347002	237984
	5_backgroud	305032	2.798	109018
	6	1078318	3.525	305906	212000
	6_backgroud	308479	3.285	93905.3
	7	782748	3.67	213283	137835
	7_backgroud	210047	2.784	75447.9
	8	1287309	5.253	245062	179312
	8_backgroud	230520	3.506	65750.1
	9	876819	2.451	357739	253109
	9_backgroud	254984	2.437	104630
	10	879273	2.675	328700	244178
	10_backgroud	137433	1.626	84522.1
TE2_hamSk1	1	486195	2.993	162444	57865.2	84744.5
	1_backgroud	269395	2.576	104579
	2	351498	2.377	147875	69941.8
	2_backgroud	204340	2.622	77932.9
	3	479873	3.234	148384	66025.5
	3_backgroud	241639	2.934	82358.2
	4	318706	1.82	175113	111119
	4_backgroud	94520	1.477	63994.6
	5	653667	3.25	201128	124997
	5_backgroud	206545	2.713	76131.6
	6	421083	2.294	183558	106736
	6_backgroud	153415	1.997	76822.7
	7	575543	3.465	166102	98726.1
	7_backgroud	184138	2.733	67375.8
	8	421844	3.04	138764	37342.8
	8_backgroud	260755	2.571	101422
	9	572096	2.96	193276	97359.7
	9_backgroud	322949	3.367	95915.9
	10	501998	2.678	187453	77332.5
	10_backgroud	292589	2.657	110120
TE3_wt	1	1657380	4.512	367327	275903	246761
	1_backgroud	364601	3.988	91424.5
	2	1154854	2.851	405070	302616
	2_backgroud	283489	2.767	102454
	3	1030320	2.362	436207	324600
	3_backgroud	211717	1.897	111606
	4	1343232	4.014	334637	250894
	4_backgroud	288410	3.444	83742.7
	5	1244243	3.2	388826	262133
	5_backgroud	378938	2.991	126693
	6	1292466	3.949	327289	239168
	6_backgroud	262515	2.979	88121.9
	7	1332600	3.687	361432	241523
	7_backgroud	464167	3.871	119909
	8	1211886	3.985	304112	204620
	8_backgroud	339266	3.41	99491.5
	9	1100940	4.067	270701	187361
	9_backgroud	319523	3.834	83339.3
	10	1250809	3.604	347061	178793
	10_backgroud	451464	2.683	168268
TE3_hamSk1	1	454441	3.911	116196	46661.6	88655.2
	1_backgroud	236972	3.408	69534
	2	357158	1.199	297880	130649
	2_backgroud	256198	1.532	167231
Average signal intensity per sample
	TE1	TE2	TE3	Average
wt	233346	201974	246761	227361
hamSk1	102320	84744.5	88655.2
wt normalized to wt_average; hamSk1 normalized to wt in each TE (paired)
	TE1	TE2	TE3	STEDV	TTEST
wt	1.02633	0.888343	1.08533	0.101098
hamSk1	0.438488	0.419581	0.359275	0.0413701	0.0152942
