# Supplementary material for: Drosophila hamlet mediates epithelial tissue assembly of the reproductive system
Source: eLife. 2025 Jul 4;13:RP104164. doi: 10.7554/eLife.104164 (PMC12227202; doi:10.7554/eLife.104164)
Supplement: Figure 2—source data 5. [file elife-104164-fig2-data5.xlsx]

## Sheet: Figure 2I
Raw data: GFPRNAi vs hamRNAi
RNAi	RawIntDen	Length	RawIntDen/Length	background subtration	Average per sample
GFP _SV1_a	56386891	30.037	1.87725e+06	1.60915e+06	1.53331e+06
GFP _SV1_a_background	7840974	29.247	268095
GFP _SV1_b	50489187	27.154	1.85936e+06	1.45746e+06
GFP _SV1_b_background	10355816	25.767	401902
GFP _SV2_a	91350573	36.465	2.50516e+06	2.07546e+06	2.0962e+06
GFP _SV2_a_background	13584361	31.614	429694
GFP _SV2_b	69743042	27.254	2.559e+06	2.11695e+06
GFP _SV2_b_background	10776876	24.379	442056
GFP _SV3_a	72562970	34.496	2.10352e+06	1.51467e+06	1.2719e+06
GFP _SV3_a_background	17779106	30.193	588849
GFP _SV3_b	36612510	20.983	1.74487e+06	1.02912e+06
GFP _SV3_b_background	13987006	19.542	715741
GFP _SV4_a	59382902	25.429	2.33524e+06	1.81523e+06	1.90138e+06
GFP _SV4_a_background	12642680	24.312	520018
GFP _SV4_b	65149276	25.739	2.53115e+06	1.98754e+06
GFP _SV4_b_background	13392288	24.636	543606
ham_SV1_a	39489545	28.375	1.3917e+06	981656	1.06422e+06
ham_SV1_a_background	9988301	24.359	410046
ham_SV1_b	40147845	23.298	1.72323e+06	1.14678e+06
ham_SV1_b_background	13778917	23.903	576451
ham_SV2_a	68241033	34.627	1.97075e+06	1.51509e+06	1.45471e+06
ham_SV2_a_background	14980712	32.877	455659
ham_SV2_b	59166406	33.026	1.79151e+06	1.39432e+06
ham_SV2_b_background	12136417	30.556	397186
ham_SV3_a	66827831	38.899	1.71798e+06	1.35765e+06	1.28078e+06
ham_SV3_a_background	13489408	37.436	360333
ham_SV3_b	49907999	30.526	1.63493e+06	1.2039e+06
ham_SV3_b_background	11309411	26.238	431032
ham_SV4_a	51621324	29.912	1.72577e+06	1.0975e+06	892008
ham_SV4_a_background	15322326	24.388	628273
ham_SV4_b	31278368	25.141	1.24412e+06	686517
ham_SV4_b_background	15434393	27.68	557601
Average intensity per sample
	SV1	SV2	SV3	SV4	Average
GFPRNAi	1.53331e+06	2.0962e+06	1.2719e+06	1.90138e+06	1.7007e+06
hamRNAi	1.06422e+06	1.45471e+06	1.28078e+06	892008
nomalize to GFPRNAi _average
	SV1	SV2	SV3	SV4	STDEV	TTEST
GFPRNAi	0.901575	1.23256	0.747868	1.118	0.216998	0.0548077
hamRNAi	0.625754	0.855358	0.753089	0.524495	0.144732
