# Supplementary material for: Drosophila hamlet mediates epithelial tissue assembly of the reproductive system
Source: eLife. 2025 Jul 4;13:RP104164. doi: 10.7554/eLife.104164 (PMC12227202; doi:10.7554/eLife.104164)
Supplement: Figure 2—source data 6. [file elife-104164-fig2-data6.xlsx]

## Sheet: Figure 2J
Raw data: GFPRNAi vs hamRNAi
RNAi	RawIntDen	Length	relative intensity	background substraction	average per sample
GFP_Te1_a	28582560	14.665	1.94903e+06	1.45186e+06	1.87699e+06
GFP_Te1_a_Background	4210085	8.468	497176
GFP_Te1_b	29463065	10.148	2.90334e+06	2.38343e+06
GFP_Te1_b_Background	5603509	10.778	519902
GFP_Te1_c	22434038	9.276	2.4185e+06	1.79569e+06
GFP_Te1_c_Background	5276451	8.472	622811
GFP_Te2_a	34658775	9.158	3.78454e+06	3.09301e+06	2.4382e+06
GFP_Te2_a_Background	5523249	7.987	691530
GFP_Te2_b	29243302	9.095	3.21532e+06	2.45832e+06
GFP_Te2_b_Background	7255087	9.584	757000
GFP_Te2_c	27758942	11.636	2.38561e+06	1.76328e+06
GFP_Te2_c_Background	4503170	7.236	622329
GFP_Te3_a	28918947	11.569	2.49969e+06	1.78012e+06	2.698e+06
GFP_Te3_a_Background	6955437	9.666	719578
GFP_Te3_b	46708888	10.433	4.47703e+06	3.90845e+06
GFP_Te3_b_Background	4431499	7.794	568578
GFP_Te3_c	23363983	7.673	3.04496e+06	2.40544e+06
GFP_Te3_c_Background	4320611	6.756	639522
GFP_Te4_a	30583032	8.254	3.70524e+06	2.93562e+06	2.58945e+06
GFP_Te4_a_Background	5149484	6.691	769614
GFP_Te4_b	21263214	7.283	2.91957e+06	2.16429e+06
GFP_Te4_b_Background	5082246	6.729	755275
GFP_Te4_c	28108889	8.092	3.47366e+06	2.66843e+06
GFP_Te4_c_Background	3982683	4.946	805233
ham_Te1_a	14499660	16.809	862613	588302	654395
ham_Te1_a_Background	4350291	15.859	274311
ham_Te1_b	20548259	19.879	1.03367e+06	729379
ham_Te1_b_Background	6339221	20.833	304287
ham_Te1_c	19772270	18.809	1.05121e+06	645504
ham_Te1_c_Background	6824841	16.822	405709
ham_Te2_a	19553136	15.131	1.29226e+06	630443	560004
ham_Te2_a_Background	6197226	9.364	661814
ham_Te2_b	16134778	10.711	1.50637e+06	659698
ham_Te2_b_Background	8659808	10.228	846677
ham_Te2_c	13316805	13.661	974805	389872
ham_Te2_c_Background	7616995	13.022	584933
ham_Te3_a	16217498	19.306	840024	522745	448270
ham_Te3_a_Background	4575153	14.42	317278
ham_Te3_b	16999456	18.351	926350	583564
ham_Te3_b_Background	6063891	17.69	342786
ham_Te3_c	17063554	20.64	826723	238500
ham_Te3_c_Background	10662706	18.127	588222
ham_Te4_a	22216356	17.29	1.28493e+06	875713	767611
ham_Te4_a_Background	4933051	12.055	409212
ham_Te4_b	16012994	11.162	1.4346e+06	1.01049e+06
ham_Te4_b_Background	3842466	9.06	424113
ham_Te4_c	11694619	12.568	930508	416634
ham_Te4_c_Background	4993827	9.718	513874
relative intensity after background substraction
	Te1	Te2	Te3	Te4	Average
GFPRNAi	1.87699e+06	2.4382e+06	2.698e+06	2.58945e+06	2.40066e+06
hamRNAi	654395	560004	448270	767611
relative intensity after background substraction_normalized to GFP.RNAi average
	Te1	Te2	Te3	Te4	STEDV	TTEST
GFPRNAi	0.781865	1.01564	1.12386	1.07864	0.152044	9.25833e-05
hamRNAi	0.272589	0.233271	0.186728	0.31975	0.0566289
