# Supplementary material for: Drosophila hamlet mediates epithelial tissue assembly of the reproductive system
Source: eLife. 2025 Jul 4;13:RP104164. doi: 10.7554/eLife.104164 (PMC12227202; doi:10.7554/eLife.104164)
Supplement: Figure 3—figure supplement 1—source data 1. [file elife-104164-fig3-figsupp1-data1.xlsx]

## Sheet: Figure3-figure supplement 1D
biological replicate 1
FF
	GFP_RFP				Ham_FL				Ham_CZF_VP16				Ham_NZF_VP16
2T_Luc	254970	199310	116980	279370	67890	75380	66450	74500	419340	283740	213990	115800	130980	130970	132090	164830
shot_enh1	10590	7950	6640	8700	19100	15820	13360	18690	11740	10200	12850	25860	39050	40670	33330	52270
shot_enh2	8030	5820	4560	5270	6140	9320	8600	7660	8700	7500	8570	5730	28910	26720	17810	37610
RL
	GFP_RFP				Ham_FL				Ham_CZF_VP16				Ham_NZF_VP16
2T_Luc	7040	6700	3450	7000	7640	7990	6870	7000	17660	14380	9670	5110	3900	4120	4410	4770
shot_enh1	3240	2550	2300	2850	3060	2530	2470	2540	4560	3490	4220	8480	3440	3570	3360	5390
shot_enh2	4410	3170	2460	3200	2330	3870	4310	3350	5250	4420	4440	3690	3710	3230	3110	5570
FF
	GFP_RFP				Ham_PRdel
2T_Luc	573460	494720	719460	547250	112490	45530	91640	84810
shot_enh1	76720	77070	45140	53290	56160	58310	41540	35080
shot_enh2	35840	28770	26640	24660	16980	13040	12110	15870
RL
	GFP_RFP				Ham_PRdel
2T_Luc	17110	15650	23180	13070	15310	6620	12900	9550
shot_enh1	13130	13570	7480	9660	13960	14340	10600	7740
shot_enh2	26270	21540	19240	19430	10970	7910	8360	9210
biological replicate 2
FF
	GFP_RFP				Ham_FL				Ham_CZF_VP16				Ham_NZF_VP16				Ham_PRdel
2T_Luc	318920	356600	327700	318390	35880	29830	26060	23670	383840	368690	379260	472780	231810	207220	137610	133540	84250	65000	57490	72950
shot_enh1	56940	50130	51060	57310	36200	31560	33260	37870	17040	13150	12890	13040	65940	65500	65580	56360	90490	82300	79070	48790
shot_enh2	24570	21300	24650	24680	11040	10100	9820	10210	9480	7640	11580	7880	32350	30170	32260	22150	21200	20850	18520	10110
RL
	GFP_RFP				Ham_FL				Ham_CZF_VP16				Ham_NZF_VP16				Ham_PRdel
2T_Luc	15250	17150	16250	16980	4190	3300	3250	2530	30150	29320	27090	24580	10840	9390	5740	5440	14530	9870	7170	10130
shot_enh1	13460	12230	12980	11470	3240	2680	2670	5550	5980	5200	4350	4100	11610	11070	11240	9230	23850	22620	18940	11270
shot_enh2	13550	12810	15310	12960	3080	3290	3020	3610	9580	8910	11300	7190	11610	11310	10500	7530	16620	17030	15620	8280
biological replicate 3
FF
	GFP_RFP				Ham_FL				Ham_CZF_VP16				Ham_NZF_VP16				Ham_PRdel
2T_Luc	3145650	3760430	3322660	3625330	646950	722870	757940	637840	1597540	1538120	1780970	1519810	1159610	1300710	1485990	1450470	390880	353800	361790	451410
shot_enh1	461220	424000	444640	463650	268810	338640	382670	322000	338420	398970	388240	331970	308570	292260	316200	347780	350730	303870	323060	380020
shot_enh2	229440	183680	192950	199740	136880	125730	125700	125970	128220	135390	129420	122090	123100	148250	148620	143690	92370	94140	85340	111200
RL
	GFP_RFP				Ham_FL				Ham_CZF_VP16				Ham_NZF_VP16				Ham_PRdel
2T_Luc	14910	18390	16100	15340	36740	42660	38210	36250	33830	32730	36330	28400	10660	9970	11940	11320	7730	7100	8150	9330
shot_enh1	15990	15020	18880	16280	20550	26200	28010	26580	21270	24920	22330	21940	11630	10650	10160	12770	5300	5520	5640	6060
shot_enh2	19870	15980	16340	17660	35140	32830	32760	32230	24570	27600	23950	26360	10330	11070	10580	10410	8460	8950	7970	8930
