# Supplementary material for: Drosophila hamlet mediates epithelial tissue assembly of the reproductive system
Source: eLife. 2025 Jul 4;13:RP104164. doi: 10.7554/eLife.104164 (PMC12227202; doi:10.7554/eLife.104164)
Supplement: Figure 4—source data 1. [file elife-104164-fig4-data1.xlsx]

## Sheet: Figure 4F
biological replicate 1
FF
	GFP_RFP				Ham_FL				Ham_CZF_VP16				Ham_NZF_VP16
2T_Luc	254970	199310	116980	279370	67890	75380	66450	74500	419340	283740	213990	115800	130980	130970	132090	164830
shg_enh1	28320	25000	24720	26110	20610	18100	15230	31960	35430	56250	39330	48980	77450	89940	58070	126020
shg_enh2	26420	24060	22830	19400	14900	13290	14920	9630	17250	13100	11700	11480	28450	33520	28330	17900
RL
	GFP_RFP				Ham_FL				Ham_CZF_VP16				Ham_NZF_VP16
2T_Luc	7040	6700	3450	7000	7640	7990	6870	7000	17660	14380	9670	5110	3900	4120	4410	4770
shg_enh1	5960	5130	4100	4210	3720	3670	3020	5760	6900	10140	7080	9820	3820	4060	3410	5600
shg_enh2	6940	6350	5680	4000	5790	5360	6290	5960	3660	3940	3750	3550	5070	4990	4200	2600
FF
	GFP_RFP				Ham_PRdel
2T_Luc	573460	494720	719460	547250	112490	45530	91640	84810
shg_enh1	110910	98260	99130	90110	62950	64400	62750	62510
shg_enh2	106940	102500	110170	105000	14730	13620	16400	20830
RL
	GFP_RFP				Ham_PRdel
2T_Luc	17110	15650	23180	13070	15310	6620	12900	9550
shg_enh1	12950	12210	11710	10810	12690	12280	11380	10300
shg_enh2	23800	27200	24770	23760	12760	11840	15070	10250
biological replicate 2
FF
	GFP_RFP				Ham_FL				Ham_CZF_VP16				Ham_NZF_VP16				Ham_PRdel
2T_Luc	318920	356600	327700	318390	35880	29830	26060	23670	383840	368690	379260	472780	231810	207220	137610	133540	84250	65000	57490	72950
shg_enh1	77090	79500	74780	57390	35280	28650	29410	28900	23430	19710	25870	50810	128010	118180	98840	100830	60410	64790	40920	34780
shg_enh2	57630	56520	52830	57050	3710	4900	4210	5040	67040	75060	71270	65020	27170	28100	27150	40870	19740	19620	15430	12500
RL
	GFP_RFP				Ham_FL				Ham_CZF_VP16				Ham_NZF_VP16				Ham_PRdel
2T_Luc	15250	17150	16250	16980	4190	3300	3250	2530	30150	29320	27090	24580	10840	9390	5740	5440	14530	9870	7170	10130
shg_enh1	13450	14650	13270	12940	3420	2470	2640	3140	5480	4460	7010	16380	11420	10980	8870	8990	14150	14950	7430	7870
shg_enh2	21920	20870	20290	18800	5000	4310	5460	4800	34080	35610	31710	32040	6010	6280	5860	10030	24700	18880	8280	9660
biological replicate 3
FF
	GFP_RFP				Ham_FL				Ham_CZF_VP16				Ham_NZF_VP16				Ham_PRdel
2T_Luc	3145650	3760430	3322660	3625330	646950	722870	757940	637840	1597540	1538120	1780970	1519810	1159610	1300710	1485990	1450470	390880	353800	361790	451410
shg_enh1	347100	270650	285480	291860	153660	151320	142950	166850	342060	398880	349000	300090	193140	180680	202020	247970	188370	173640	165340	201110
shg_enh2	442820	533740	524620	532860	100690	152660	146510	155690	292850	370350	409200	323180	181360	224110	259040	269200	50440	67210	75240	76990
RL
	GFP_RFP				Ham_FL				Ham_CZF_VP16				Ham_NZF_VP16				Ham_PRdel
2T_Luc	14910	18390	16100	15340	36740	42660	38210	36250	33830	32730	36330	28400	10660	9970	11940	11320	7730	7100	8150	9330
shg_enh1	21230	17090	18040	19200	30080	32040	26290	33670	33230	37100	34230	26930	8380	8960	9000	9940	7160	8150	7860	9060
shg_enh2	19080	20600	20810	21890	33600	43010	42670	41330	30970	37060	44390	30270	8930	11430	11530	11850	7240	8170	10130	9350
