# Supplementary material for: Drosophila hamlet mediates epithelial tissue assembly of the reproductive system
Source: eLife. 2025 Jul 4;13:RP104164. doi: 10.7554/eLife.104164 (PMC12227202; doi:10.7554/eLife.104164)
Supplement: Figure 4—source data 2. [file elife-104164-fig4-data2.xlsx]

## Sheet: Figure 4G
biological replicate 1
FF
	GFP_RFP				Ham_FL				Ham_CZF_VP16				Ham_NZF_VP16
2T_Luc	254970	199310	116980	279370	67890	75380	66450	74500	419340	283740	213990	115800	130980	130970	132090	164830
wnt2_enh1	13170	9110	7760	5690	7520	6440	5860	7750	13210	16480	14650	23720	34930	28480	24340	32800
wnt2_enh2	3700	6340	4660	3960	3970	2870	4240	4050	6500	9120	8190	16610	45120	43200	38370	51080
wnt2_enh3	14130	6780	6850	4420	7210	4420	5230	4280	7610	7340	11650	9520	30020	23220	29860	28860
wnt2_enh4	27260	16690	11970	17120	10770	8730	9240	14370	25240	24170	21060	26580	43420	40720	40610	41510
RL
	GFP_RFP				Ham_FL				Ham_CZF_VP16				Ham_NZF_VP16
2T_Luc	7040	6700	3450	7000	7640	7990	6870	7000	17660	14380	9670	5110	3900	4120	4410	4770
wnt2_enh1	7640	5490	3670	3630	3080	2960	3400	3630	8310	10530	9130	21360	4300	4340	3710	4570
wnt2_enh2	1890	3480	2450	2660	2520	2030	2980	2540	5560	6880	5610	17430	4510	3960	4080	5110
wnt2_enh3	9560	4510	4570	3280	4240	2500	2520	2340	6020	5290	8900	11830	4480	4190	6090	4650
wnt2_enh4	8520	4340	3550	4740	3530	3240	2780	5440	8670	8020	7310	8600	4060	4660	3320	3920
FF
	GFP_RFP				Ham_PRdel
2T_Luc	573460	494720	719460	547250	112490	45530	91640	84810
wnt2_enh2	40350	47510	39790	34720	19440	20580	15300	17980
wnt2_enh3	66300	66090	66850	58290	19740	23700	22450	14210
RL
	GFP_RFP				Ham_PRdel
2T_Luc	17110	15650	23180	13070	15310	6620	12900	9550
wnt2_enh2	27540	34160	27320	25670	12800	14040	10160	10820
wnt2_enh3	21490	22250	21090	17760	13940	15840	16400	10190
biological replicate 2
FF
	GFP_RFP				Ham_FL				Ham_CZF_VP16				Ham_NZF_VP16				Ham_PRdel
2T_Luc	318920	356600	327700	318390	35880	29830	26060	23670	383840	368690	379260	472780	231810	207220	137610	133540	84250	65000	57490	72950
wnt2_enh1	17070	17790	17930	18140	7230	6620	5890	6250	18500	18260	14830	14070	35620	39010	34970	28090	18780	16690	15800	11260
wnt2_enh2	27250	26850	31010	25420	9950	10040	10640	8720	9720	15740	10580	12050	45680	41320	40280	38580	17520	18460	18180	11850
wnt2_enh3	24260	24340	24320	24010	7510	7000	6510	6120	4360	12770	10920	7750	24660	20420	20770	21390	9630	10310	10190	7810
RL
	GFP_RFP				Ham_FL				Ham_CZF_VP16				Ham_NZF_VP16				Ham_PRdel
2T_Luc	15250	17150	16250	16980	4190	3300	3250	2530	30150	29320	27090	24580	10840	9390	5740	5440	14530	9870	7170	10130
wnt2_enh1	17520	18370	15970	15530	4080	4090	3660	3320	24110	24540	20220	19130	9590	10500	8710	8810	17340	16020	12600	10210
wnt2_enh2	15870	14520	18180	14510	5250	4900	4180	4430	9690	18520	10740	16280	10150	10250	10570	8300	15510	16230	16720	10400
wnt2_enh3	14410	12230	13230	14470	3930	3730	3190	3680	4090	13920	12790	9130	5710	5600	5440	7120	6550	7280	5820	6960
FF
	GFP_RFP				Ham_FL				Ham_CZF_VP16				Ham_NZF_VP16				Ham_PRdel
2T_Luc	573460	494720	719460	547250	142840	99520	89760	84260	227930	181400	217690	194610	320520	319190	326170	251920	112490	45530	91640	84810
wnt2_enh4	114000	93640	100920	103640	57590	48780	53120	40480	68440	71300	59650	44780	81450	75530	64170	49790	12820	20510	15200	15760
RL
	GFP_RFP				Ham_FL				Ham_CZF_VP16				Ham_NZF_VP16				Ham_PRdel
2T_Luc	17110	15650	23180	13070	14640	9990	8660	8710	13900	11380	14600	9080	14300	11280	12420	8910	15310	6620	12900	9550
wnt2_enh4	27370	23210	24450	24920	13060	10380	11380	10030	27470	31240	28140	19480	12260	12110	11170	8780	9020	14420	10300	11350
biological replicate 3
FF
	GFP_RFP				Ham_FL				Ham_CZF_VP16				Ham_NZF_VP16				Ham_PRdel
2T_Luc	3145650	3760430	3322660	3625330	646950	722870	757940	637840	1597540	1538120	1780970	1519810	1159610	1300710	1485990	1450470	390880	353800	361790	451410
wnt2_enh1	165570	205480	192080	180080	116040	146320	148080	145540	150880	133840	141950	135340	230930	203660	228280	226400	77520	75000	76000	85120
wnt2_enh2	254400	272000	283930	278770	154950	163080	172980	159300	253270	262240	269750	170430	257740	232700	241130	315990	96230	101790	102530	110290
wnt2_enh3	208490	162340	188420	198000	183430	180890	174460	186140	158390	149760	154600	108120	252760	177700	224890	261160	92030	124280	119670	134960
wnt2_enh4	489390	426820	444300	465500	223450	155650	220320	174180	273480	262540	270450	266100	394530	324120	351410	427340	113900	109700	110990	141450
RL
	GFP_RFP				Ham_FL				Ham_CZF_VP16				Ham_NZF_VP16				Ham_PRdel
2T_Luc	14910	18390	16100	15340	36740	42660	38210	36250	33830	32730	36330	28400	10660	9970	11940	11320	7730	7100	8150	9330
wnt2_enh1	15150	21360	20730	19150	30870	38280	35040	37240	35540	29920	32640	31090	10080	11480	12470	11720	8280	9020	9200	9230
wnt2_enh2	23910	21850	20590	20010	41750	42970	41990	42880	38760	39840	43640	27460	11100	11670	11830	13970	8590	9720	10240	10110
wnt2_enh3	20220	14250	17470	19730	42990	42490	44070	42800	36450	33100	33160	25230	10600	10560	12770	13140	6480	9530	8940	9490
wnt2_enh4	19490	18020	17340	18960	38690	22320	39220	36620	32660	35060	35130	36670	10310	11310	11460	13030	7570	8940	8950	11210
