# Supplementary material for: Drosophila hamlet mediates epithelial tissue assembly of the reproductive system
Source: eLife. 2025 Jul 4;13:RP104164. doi: 10.7554/eLife.104164 (PMC12227202; doi:10.7554/eLife.104164)
Supplement: Figure 5—source data 1. [file elife-104164-fig5-data1.xlsx]

## Sheet: Figure 5A
Gene.Name	BL Number	replicates	48h_ pupae	Average_48h_ pupae	relative fertility
GroupA
GFP control	9330	rep1	105	115	1
		rep2	125
ham	26728	rep1	0	0	0
		rep2	0
dmrt93B	50656	rep1	103	109	0.947826
		rep2	115
TyrR	57496	rep1	113	102	0.886957
		rep2	91
CG31886	36769	rep1	107	96.5	0.83913
		rep2	86
NimC2	25960	rep1	100	105	0.913043
		rep2	110
Acp36DE	67325	rep1	115	118.5	1.03043
		rep2	122
HGTX	61188	rep1	100	93	0.808696
		rep2	86
kon	80477	rep1	135	131.5	1.14348
		rep2	128
CG3267	52912	rep1	105	107.5	0.934783
		rep2	110
CG6225	51435	rep1	90	95	0.826087
		rep2	100
CG15117	33693	rep1	58	60	0.521739
		rep2	62
Mec2	61259	rep1	95	93.5	0.813043
		rep2	92
tej	41929	rep1	103	113.5	0.986957
		rep2	124
shark	42555	rep1	120	126	1.09565
		rep2	132
shark	57017	rep1	159	153.5	1.33478
		rep2	148
CG7456 (Cog4)	51866	rep1	12	13	0.113043
		rep2	14
AkhR	51710	rep1	52	58	0.504348
		rep2	64
Sk2	36741	rep1	105	108.5	0.943478
		rep2	112
CG17036	51868	rep1	90	93.5	0.813043
		rep2	97
cag	63554	rep1	65	67.5	0.586957
		rep2	70
Dscam4	51508	rep1	106	103	0.895652
		rep2	100
kek6	61212	rep1	148	143.5	1.24783
		rep2	139
Cht5	57512	rep1	115	113	0.982609
		rep2	111
CG31776	42897	rep1	115	119	1.03478
		rep2	123
cv-d	63711	rep1	123	122.5	1.06522
		rep2	122
ClC-a	53337	rep1	92	94.5	0.821739
		rep2	97
CG17018 (Marf1)	57024	rep1	72	66	0.573913
		rep2	60
vir	67890	rep1	110	103	0.895652
		rep2	96
vir	55694	rep1	105	107	0.930435
		rep2	109
pgant3	61194	rep1	105	97	0.843478
		rep2	89
Dh44	25804	rep1	81	84.5	0.734783
		rep2	88
CG7997	63655	rep1	77	78.5	0.682609
		rep2	80
CG7997	57781	rep1	133	128	1.11304
		rep2	123
CG5846	64505	rep1	92	94.5	0.821739
		rep2	97
gsb-n	28078	rep1	45	60.5	0.526087
		rep2	76
cutlet	62492	rep1	110	114	0.991304
		rep2	118
shot	64041	rep1	88	89	0.773913
		rep2	90
GroupB
			16-18h_ pupae	Average_16-18h_ pupae
GFP control	9330	rep1	78	64	1
		rep2	50
ham	26728	rep1	0	0	0
		rep2	0
yellow-c	62395	rep1	50	53	0.828125
		rep2	56
CG7484	61869	rep1	39	42	0.65625
		rep2	45
CG17186	27079	rep1	0	23	0.359375
		rep2	46
CG5377	53977	rep1	52	53.5	0.835938
		rep2	55
CG32052	36763	rep1	52	54	0.84375
		rep2	56
CG9977	28523	rep1	59	61.5	0.960938
		rep2	64
CG9977	57869	rep1	56	57.5	0.898438
		rep2	59
P32	34585	rep1	67	70.5	1.10156
		rep2	74
CG9121	58301	rep1	68	63.5	0.992188
		rep2	59
Tl	31044	rep1	25	28	0.4375
		rep2	31
shark	25788	rep1	30	34	0.53125
		rep2	38
shark	55874	rep1	63	65.5	1.02344
		rep2	68
Elp2	57580	rep1	48	51.5	0.804688
		rep2	55
wun2	32423	rep1	72	65	1.01562
		rep2	58
wun2	32381	rep1	81	74	1.15625
		rep2	67
CG7456 (Cog4)	28634	rep1	53	55	0.859375
		rep2	57
CG7456 (Cog4)	53679	rep1	30	25	0.390625
		rep2	20
Aplip1	26024	rep1	82	75	1.17188
		rep2	68
CG13025	62460	rep1	65	68	1.0625
		rep2	71
Stlk	27305	rep1	71	68	1.0625
		rep2	65
Stlk	34620	rep1	77	82	1.28125
		rep2	87
AkhR	29577	rep1	0	15	0.234375
		rep2	30
Sema-1a	29554	rep1	69	61.5	0.960938
		rep2	54
CG31935 (Rab3GAP19	64495	rep1	40	43	0.671875
		rep2	46
CG4872	28738	rep1	50	47	0.734375
		rep2	44
CG4872	64486	rep1	0	25	0.390625
		rep2	50
Snoo	31934	rep1	81	80.5	1.25781
		rep2	80
Snoo	57850	rep1	42	50.5	0.789062
		rep2	59
Pcd	77347	rep1	52	55.5	0.867188
		rep2	59
Hr46	27253	rep1	37	33	0.515625
		rep2	29
Hr46	27254	rep1	58	62.5	0.976562
		rep2	67
GroupC
			7-8h_ pupae	Average_7-8h_ pupae
GFP control	9330	rep1	33	31	1
		rep2	29
ham	26728	rep1	0	0	0
		rep2	0
CG5945	65914	rep1	71	76	2.45161
		rep2	81
CG17477	42821	rep1	9	10	0.322581
		rep2	11
CG42272	63602	rep1	76	78	2.51613
		rep2	80
Sox21b	60120	rep1	61	59.5	1.91935
		rep2	58
CG2736	44655	rep1	43	44	1.41935
		rep2	45
CG17283	63723	rep1	18	14	0.451613
		rep2	10
Or47a	67366	rep1	20	28.5	0.919355
		rep2	37
Mal-B1	55346	rep1	21	30	0.967742
		rep2	39
decay	65879	rep1	0	14.5	0.467742
		rep2	29
CG16727	57434	rep1	62	66	2.12903
		rep2	70
CG18278	28520	rep1	71	63	2.03226
		rep2	55
CG18278	51878	rep1	31	40	1.29032
		rep2	49
Nplp1	25872	rep1	26	29.5	0.951613
		rep2	33
mthl4	55244	rep1	20	26.5	0.854839
		rep2	33
mthl3	41887	rep1	45	42.5	1.37097
		rep2	40
mthl3	62496	rep1	53	46.5	1.5
		rep2	40
CG10211	63532	rep1	34	41.5	1.33871
		rep2	49
CG5022	33359	rep1	31	38	1.22581
		rep2	45
Spn28B	43546	rep1	53	46	1.48387
		rep2	39
Spn28B	50996	rep1	22	24	0.774194
		rep2	26
CG2145	61997	rep1	44	41.5	1.33871
		rep2	39
CG2145	60036	rep1	58	56.5	1.82258
		rep2	55
NimC4	61866	rep1	32	34	1.09677
		rep2	36
Gs1	40836	rep1	32	34.5	1.1129
		rep2	37
Gs1	52974	rep1	42	40.5	1.30645
		rep2	39
AstC-R1	62372	rep1	61	53	1.70968
		rep2	45
AstC-R1	27506	rep1	21	33.5	1.08065
		rep2	46
Shab	25805	rep1	32	44	1.41935
		rep2	56
CG10361	44512	rep1	66	61	1.96774
		rep2	56
Idgf4	55381	rep1	8	9	0.290323
		rep2	10
Ptp52F	64940	rep1	40	42.5	1.37097
		rep2	45
CG32037	62340	rep1	36	35	1.12903
		rep2	34
CG10747	64629	rep1	25	30	0.967742
		rep2	35
HGTX	29382	rep1	46	43	1.3871
		rep2	40
Gr64c	36734	rep1	8	5	0.16129
		rep2	2
CG16820	56027	rep1	50	54.5	1.75806
		rep2	59
CG14022	57403	rep1	28	32.5	1.04839
		rep2	37
Not11	56853	rep1	22	33	1.06452
		rep2	44
PH4alphaMP	65190	rep1	0	14.5	0.467742
		rep2	29
CG17760	64919	rep1	51	50	1.6129
		rep2	49
CG11406	61185	rep1	0	0	0
		rep2	0
CG8646	67313	rep1	36	42	1.35484
		rep2	48
CG7371	38268	rep1	25	30	0.967742
		rep2	35
CG11069	77158	rep1	8	10	0.322581
		rep2	12
CG43401	93725	rep1	47	52	1.67742
		rep2	57
CG12484	62897	rep1	30	37.5	1.20968
		rep2	45
CG10131	62272	rep1	36	42	1.35484
		rep2	48
Cyp6a2	64008	rep1	49	54	1.74194
		rep2	59
AdSL	34347	rep1	20	13	0.419355
		rep2	6
mTerf3	62951	rep1	43	51	1.64516
		rep2	59
Ugt58Fa	64981	rep1	25	39	1.25806
		rep2	53
CG42663	54808	rep1	22	30.5	0.983871
		rep2	39
CG40160	44268	rep1	35	39.5	1.27419
		rep2	44
Tsp42Er	57477	rep1	42	53.5	1.72581
		rep2	65
Irk1	25823	rep1	73	76	2.45161
		rep2	79
CG31233	65352	rep1	29	38	1.22581
		rep2	47
CG33306	60880	rep1	38	31.5	1.01613
		rep2	25
MED16	34012	rep1	38	43.5	1.40323
		rep2	49
nec	66948	rep1	52	49.5	1.59677
		rep2	47
mnd	62207	rep1	37	45.5	1.46774
		rep2	54
GstE11	82975	rep1	1	2	0.0645161
		rep2	3
CngA	26014	rep1	42	50.5	1.62903
		rep2	59
pbl	28343	rep1	0	0	0
		rep2	0
Fadd	34813	rep1	31	36.5	1.17742
		rep2	42
AP-2alpha	32866	rep1	0	0	0
		rep2	0
shg	32904	rep1	0	0	0
		rep2	0
