# Supplementary material for: Drosophila hamlet mediates epithelial tissue assembly of the reproductive system
Source: eLife. 2025 Jul 4;13:RP104164. doi: 10.7554/eLife.104164 (PMC12227202; doi:10.7554/eLife.104164)
Supplement: Figure 6—figure supplement 3—source data 1. [file elife-104164-fig6-figsupp3-data1.xlsx]

## Sheet: Figure6-figure supplement 3E
	shot		CG11069		GstE11		ham		AdSL		spz6		spz5		AP2alpha		CG11406		cag		CG31935
	Area	RawIntDen	Area	RawIntDen	Area	RawIntDen	Area	RawIntDen	Area	RawIntDen	Area	RawIntDen	Area	RawIntDen	925.157	105233737	925.157	43350113	925.156	84792974	925.156	201379098
w/Df_GD1_SVa	925.156	156228164	925.156	112636670	925.156	97927184	925.157	230444829	925.156	190995774	925.156	44701426	925.156	57032212	925.157	120273961	925.157	53001429	925.156	93410917	925.156	181832012
w/Df_GD1_SVb	925.156	171350168	925.156	106099009	925.156	129419158	925.157	278019533	925.156	167620044	925.156	87555985	925.156	60350173	299.773	55816654	299.773	20378451	299.773	29408726	299.773	75000756
w/Df_GD1_EjD a	299.773	67643833	299.773	55590202	299.773	122555851	299.773	26708264	299.773	81657963	299.773	51939517	299.773	22218505	299.773	60578254	299.773	25907266	299.773	32003842	299.773	55720476
w/Df_GD1_EjD b	299.773	89802210	299.773	67188735	299.773	140127609	299.773	22878207	299.773	87356732	299.773	59046279	299.773	22730159	925.157	91522928	925.157	56188347	925.156	67100196	925.156	257005684
w/Df_GD2_SVa	925.156	132269474	925.156	101979136	925.156	122387903	925.156	306572084	925.156	181034742	925.156	53882340	925.156	57820569	925.157	158325020	925.157	73968408	925.156	80041372	925.156	207322129
w/Df_GD2_SVb	925.156	135840933	925.156	100404391	925.156	90272649	925.156	284503660	925.156	170917502	925.156	67849328	925.156	58094882	299.773	55360023	299.773	24233504	299.773	28396965	299.773	74009012
w/Df_GD2_EjD a	299.773	54109566	299.773	44752604	299.773	135845561	299.773	24615718	299.773	77601232	299.773	33575892	299.773	21902053	299.773	74339573	299.773	39732343	299.773	30495605	299.773	70753001
w/Df_GD2_EjD b	299.773	53056542	299.773	52777124	299.773	117027326	299.773	25188770	299.773	70742435	299.773	42151764	299.773	19558980	925.157	114280636	925.157	71775486	925.156	85187742	925.156	152848980
w/Df_GD3_SVa	925.156	194844414	925.156	101213108	925.156	64666170	925.156	238032867	925.156	167792596	925.156	43499352	925.156	67643955	925.157	92621522	925.157	24945566	925.156	96416358	925.156	208346254
w/Df_GD3_SVb	925.156	167471968	925.156	102000964	925.156	81561585	925.156	280563417	925.156	202311549	925.156	31949986	925.156	76901944	299.773	62060886	299.773	24310477	299.773	23396070	299.773	78237696
w/Df_GD3_EjD a	299.773	63935336	299.773	51973733	299.773	81000947	299.773	25896712	299.773	78287229	299.773	44683367	299.773	22977004	299.773	70820893	299.773	29537973	299.773	25893079	299.773	84641617
w/Df_GD3_EjD b	299.773	58110376	299.773	40536848	299.773	97504735	299.773	21444950	299.773	80125165	299.773	63067785	299.773	23968091							925.156	136674546
w/Df_GD4_SVa					925.156	70317855					925.156	27321173									925.156	145833034
w/Df_GD4_SVb					925.156	83957494					925.156	75967102									299.773	41367003
w/Df_GD4_EjD a					299.773	70822320					299.773	57618680									299.773	50794098
w/Df_GD4_EjD b					299.773	68235315					299.773	47611681
																					925.156	123846377
sk1/Df_GD1_SVa	925.156	216803045	925.156	149955899	925.156	153045432	925.157	180397716	925.156	85792653	925.156	76482570	925.156	78934108	925.157	160509355	925.157	85951836	925.156	53329473	925.156	127119849
sk1/Df_GD1_SVb	925.156	134542996	925.156	143795966	925.156	102255422	925.157	231991616	925.156	91424301	925.156	47377374	925.156	64103243	925.157	86737679	925.157	39086207	925.156	58364448	299.773	49007056
sk1/Df_GD1_EjD a	299.773	62447365	299.773	37604543	299.773	59725411	299.773	15465549	299.773	38819752	299.773	16813790	299.773	25678832	299.773	52690210	299.773	31236732	299.773	21027961	299.773	48918652
sk1/Df_GD1_EjD b	299.773	62071835	299.773	37099851	299.773	44467928	299.773	16452793	299.773	37640629	299.773	11318145	299.773	23238363	299.773	53449060	299.773	28226329	299.773	22565883	925.156	196766338
sk1/Df_GD2_SVa	925.156	147805516	925.156	132604057	925.156	172678404	925.157	292494063	925.156	107076591	925.156	103730497	925.156	58493505	925.157	84093576	925.157	34494349	925.156	66367135	925.156	175225597
sk1/Df_GD2_SVb	925.156	175234409	925.156	156555256	925.156	170013999	925.157	226937935	925.156	89327403	925.156	106252166	925.156	65157124	925.157	101692795	925.157	44301380	925.156	81745392	299.773	72254581
sk1/Df_GD2_EjD a	299.773	77829184	299.773	39846751	299.773	64871161	299.773	16164427	299.773	34596730	299.773	33975215	299.773	24044368	299.773	37264528	299.773	15154407	299.773	24298473	299.773	69160501
sk1/Df_GD2_EjD b	299.773	70073409	299.773	47759024	299.773	83119843	299.773	15938635	299.773	44238481	299.773	26591590	299.773	27517621	299.773	29131841	299.773	21026780	299.773	28300838	925.156	164631849
sk1/Df_GD3_SVa	925.156	112908344	925.156	135319466	925.156	179168475	925.157	179574507	925.156	130290188	925.156	60277785	925.156	51378020	925.157	109361965	925.157	41018620	925.156	85776351	925.156	140407577
sk1/Df_GD3_SVb	925.156	107441243	925.156	136132766	925.156	203505895	925.157	195543582	925.156	95109939	925.156	80844219	925.156	52149910	925.157	197703131	925.157	101144251	925.156	58961884	299.773	64413317
sk1/Df_GD3_EjD a	299.773	63502030	299.773	43527435	299.773	111788060	299.773	14454438	299.773	42111351	299.773	32085675	299.773	20024280	299.773	78160955	299.773	32905553	299.773	30509081	299.773	69823371
sk1/Df_GD3_EjD b	299.773	61873880	299.773	42970635	299.773	103705057	299.773	15487435	299.773	51612590	299.773	19487787	299.773	19684874	299.773	85450240	299.773	41243341	299.773	30041071	925.156	195854957
sk1/Df_GD4_SVa					925.156	261283854					925.156	90563987									925.156	182684325
sk1/Df_GD4_SVb					925.156	169490269					925.156	57115096									299.773	62140185
sk1/Df_GD4_EjD a					299.773	60321543					299.773	18264120									299.773	66914680
sk1/Df_GD4_EjD b					299.773	78979796					299.773	16380566
GD_relative signal changes (hamSk1/Df vs w/Df)
	shot		CG11069		GstE11		ham		AdSL		spz6		spz5		AP2alpha		CG11406		cag		CG31935
	SV	EjD	SV	EjD	SV	EjD	SV	EjD	SV	EjD	SV	EjD	SV	EjD	SV	EjD	SV	EjD	SV	EjD	SV	EjD
GD1	0.100243	-0.0338808	0.411515	-0.28357	0.379054	-0.499744	-0.235437	-0.347418	-0.508037	-0.517875	0.144925	-0.718466	0.135687	0.10046	0.087186	-0.159795	0.16052	0.087076	-0.339023	-0.228857	-0.326826	-0.261668
GD2	0.0116019	0.147546	0.389447	-0.159843	0.851116	-0.289461	-0.0369811	-0.343642	-0.454773	-0.5029	0.941019	-0.39387	-0.0182399	0.159958	-0.183067	-0.474402	-0.26867	-0.338552	-0.123507	-0.0695563	-0.00219548	0.0662302
GD3	-0.309974	-0.0272337	0.304362	-0.170466	1.06709	0.0346322	-0.304537	-0.387828	-0.374278	-0.409018	0.304491	-0.483872	-0.17801	-0.106688	0.350216	0.295156	0.319461	0.355556	-0.143476	0.0710883	-0.181784	0.0121071
GD4					1.32691	-0.331182					0.365103	-0.653289									0.0153667	-0.0269624
STDEV	0.215849	0.102882	0.0565804	0.0685731	0.401578	0.223381	0.138892	0.0244936	0.0673398	0.0590024	0.347398	0.149651	0.156857	0.13997	0.266649	0.386906	0.304238	0.350006	0.119083	0.150069	0.162005	0.144539
TTEST	0.685365	0.835534	0.000887009	0.105463	0.00749658	0.185096	0.109041	7.38052e-05	0.000428918	0.000716899	0.079749	0.00226437	0.871271	0.593571	0.631196	0.644611	0.747444	0.883756	0.0994506	0.523463	0.37375	0.708935
	ns	ns	***	ns	**	ns	ns	***	***	***	ns	**	ns	ns	ns	ns	ns	ns	ns	ns	ns	ns
