# Supplementary material for: Drosophila hamlet mediates epithelial tissue assembly of the reproductive system
Source: eLife. 2025 Jul 4;13:RP104164. doi: 10.7554/eLife.104164 (PMC12227202; doi:10.7554/eLife.104164)
Supplement: Figure 6—figure supplement 3—source data 2. [file elife-104164-fig6-figsupp3-data2.xlsx]

## Sheet: Figure6-figure supplement 3F
	GstE11		spz5		CG11069		shark		fz2		spz6		AP2alpha		CG31935		shot
	Area	RawIntDen	Area	RawIntDen	Area	RawIntDen	Area	RawIntDen	Area	RawIntDen	Area	RawIntDen	Area	RawIntDen	Area	RawIntDen	Area	RawIntDen
GFP.RNAi_GD1_SVa	925.156	88841352	925.156	87474083	925.156	135863343	925.156	209276680	925.156	746856427	925.156	78560457	925.156	93892636	925.156	121432948	925.156	181536285
GFP.RNAi_GD1_SVb	925.156	127904745	925.156	86914895	925.156	117832390	925.156	170069848	925.156	668247247	925.156	93977636	925.156	80528838	925.156	100609922	925.156	139984841
GFP.RNAi_GD1_EjD a	299.773	47310811	299.773	21091554	299.773	53769682	299.773	70537377	299.773	73576584	299.773	42129974	299.773	30416423	299.773	35837568	299.773	50528836
GFP.RNAi_GD1_EjD b	299.773	41933515	299.773	19719106	299.773	47615783	299.773	67807647	299.773	79903414	299.773	39806153	299.773	33330441	299.773	30194295	299.773	49493283
GFP.RNAi_GD2_SVa	925.156	130998407	925.156	91523042	925.156	147883144	925.156	162689195	925.156	791268018	925.156	115263613	925.156	65193624	925.156	125542110	925.156	200930766
GFP.RNAi_GD2_SVb	925.156	153610010	925.156	100895951	925.156	154587064	925.156	192012883	925.156	814753613	925.156	102967852	925.156	65609378	925.156	148712100	925.156	181944732
GFP.RNAi_GD2_EjD a	299.773	57458430	299.773	26665739	299.773	66880246	299.773	78429490	299.773	66800403	299.773	51142244	299.773	27432294	299.773	43161279	299.773	54492882
GFP.RNAi_GD2_EjD b	299.773	64815428	299.773	26054883	299.773	60599365	299.773	74539935	299.773	64321583	299.773	46692006	299.773	36367389	299.773	41809699	299.773	62133666
GFP.RNAi_GD3_SVa	925.156	112054076	925.156	112851445	925.156	158478446	925.156	169163333	925.156	698923674	925.156	100889870	925.156	91708551	925.156	131845671	925.156	167213606
GFP.RNAi_GD3_SVb	925.156	141656133	925.156	101103293	925.156	153378907	925.156	151958807	925.156	685106593	925.156	82679029	925.156	94495983	925.156	121003279	925.156	184565958
GFP.RNAi_GD3_EjD a	299.773	56018688	299.773	27422929	299.773	58156978	299.773	87473582	299.773	71727697	299.773	58180254	299.773	32165599	299.773	37735902	299.773	55682073
GFP.RNAi_GD3_EjD b	299.773	44033905	299.773	25648985	299.773	65892157	299.773	81825000	299.773	75795993	299.773	52490554	299.773	30781841	299.773	39395008	299.773	57248598
GFP.RNAi_GD4_SVa	925.156	121968361	925.156	90172769	925.156	131805753	925.156	157830111	925.156	980729223	925.156	98325838	925.156	84490837	925.156	132785118	925.156	184703448
GFP.RNAi_GD4_SVb	925.156	132536653	925.156	84570382	925.156	155515149	925.156	168634131	925.156	891935030	925.156	131118596	925.156	88949565	925.156	127629781	925.156	162434643
GFP.RNAi_GD4_EjD a	299.773	79190914	299.773	29897486	299.773	76860518	299.773	103480396	299.773	82837234	299.773	36469674	299.773	30062890	299.773	48399795	299.773	50092331
GFP.RNAi_GD4_EjD b	299.773	90054277	299.773	29518953	299.773	76739098	299.773	81750061	299.773	92584314	299.773	36935889	299.773	31153065	299.773	51040413	299.773	58000851
GFP.RNAi_GD5_SVa	925.156	78144256	925.156	67481980	925.156	151424877	925.156	160703656					925.156	87244827	925.156	91553357
GFP.RNAi_GD5_SVb	925.156	111222328	925.156	67204103	925.156	161037115	925.156	177723340					925.156	85096279	925.156	89348098
GFP.RNAi_GD5_EjD a	299.773	69126361	299.773	23101730	299.773	68828829	299.773	80579593					299.773	31561909	299.773	34099436
GFP.RNAi_GD5_EjD b	299.773	66324142	299.773	23380160	299.773	68244894	299.773	73325874					299.773	40433664	299.773	30655825
ham.RNAi_GD1_SVa	925.156	119854942	925.156	126765340	925.156	173624710	925.156	129039127	925.156	678974204	925.156	100421946	925.156	101054557	925.156	108810210	925.156	217729685
ham.RNAi_GD1_SVb	925.156	101150064	925.156	105428047	925.156	145199414	925.156	111443871	925.156	546599636	925.156	71095253	925.156	66540906	925.156	81451988	925.156	155426463
ham.RNAi_GD1_EjD a	299.773	40121107	299.773	24220149	299.773	47358067	299.773	60354503	299.773	64807315	299.773	28223178	299.773	41042286	299.773	29491167	299.773	57767688
ham.RNAi_GD1_EjD b	299.773	41115882	299.773	25801396	299.773	53492532	299.773	62316763	299.773	61920399	299.773	33217195	299.773	33775913	299.773	25617205	299.773	54227329
ham.RNAi_GD2_SVa	925.156	87933721	925.156	155559991	925.156	209650328	925.156	182318108	925.156	550738786	925.156	97802116	925.156	85132686	925.156	119428655	925.156	261000004
ham.RNAi_GD2_SVb	925.156	73768150	925.156	127109010	925.156	177664645	925.156	116329018	925.156	523351284	925.156	107847710	925.156	67940778	925.156	84101699	925.156	281155376
ham.RNAi_GD2_EjD a	299.773	54179614	299.773	23489671	299.773	44701057	299.773	49734753	299.773	55546233	299.773	26977241	299.773	24927377	299.773	28193157	299.773	59456256
ham.RNAi_GD2_EjD b	299.773	62223395	299.773	26545578	299.773	46494825	299.773	61062765	299.773	50147815	299.773	28469399	299.773	28227249	299.773	34347410	299.773	43631687
ham.RNAi_GD3_SVa	925.156	135049442	925.156	190711346	925.156	227454960	925.156	186492700	925.156	725655853	925.156	103330034	925.156	111096639	925.156	111196937	925.156	233863624
ham.RNAi_GD3_SVb	925.156	152501704	925.156	157497494	925.156	233551828	925.156	177148440	925.156	722953131	925.156	94224527	925.156	103022735	925.156	125854736	925.156	222199171
ham.RNAi_GD3_EjD a	299.773	42358276	299.773	27209700	299.773	53655780	299.773	51937048	299.773	65334183	299.773	25690990	299.773	28202435	299.773	28654202	299.773	49077207
ham.RNAi_GD3_EjD b	299.773	45021528	299.773	25158547	299.773	56731705	299.773	67715080	299.773	52233201	299.773	28483442	299.773	34573965	299.773	29544975	299.773	58806393
ham.RNAi_GD4_SVa	925.156	100156401	925.156	208909936	925.156	209565628	925.156	142389422	925.156	708406926	925.156	81858702	925.156	85435038	925.156	102997005	925.156	186113508
ham.RNAi_GD4_SVb	925.156	86744923	925.156	132194919	925.156	179904080	925.156	138751044	925.156	712929650	925.156	63539654	925.156	105315843	925.156	97990907	925.156	171823427
ham.RNAi_GD4_EjD a	299.773	36493899	299.773	26022534	299.773	53619723	299.773	63683487	299.773	93827779	299.773	48252232	299.773	36658040	299.773	34437482	299.773	57591806
ham.RNAi_GD4_EjD b	299.773	32459960	299.773	26051847	299.773	48951064	299.773	67130723	299.773	90017233	299.773	45467456	299.773	31690920	299.773	26179583	299.773	59221414
ham.RNAi_GD5_SVa	925.156	105881920	925.156	159835999	925.156	189998728	925.156	131703759					925.156	99177354	925.156	95069149
ham.RNAi_GD5_SVb	925.156	74320132	925.156	176105684	925.156	239682881	925.156	158503632					925.156	103171433	925.156	88157060
ham.RNAi_GD5_EjD a	299.773	52976211	299.773	24820812	299.773	62083656	299.773	85544469					299.773	49802052	299.773	35036411
ham.RNAi_GD5_EjD b	299.773	54782879	299.773	25031408	299.773	65347844	299.773	95341375					299.773	39596772	299.773	31059743
GD_relative signal changes (ham.RNAi vs GFP.RNAi)
Genes	GstE11		spz5		CG11069		shark		fz2		spz6		AP2alpha		CG31935		shot
	SV	EjD	SV	EjD	SV	EjD	SV	EjD	SV	EjD	SV	EjD	SV	IjD	SV	EjD	SV	EjD
GD1	-0.0783288	-0.340894	0.304176	-0.00948034	0.0860566	-0.216497	-0.300947	-0.233064	-0.219109	-0.165644	-0.14645	-0.324547	0.000915895	0.155652	-0.20089	-0.297677	0.0636424	0.0235508
GD2	-0.325644	-0.0555789	0.587686	-0.00920897	0.319367	-0.291504	-0.131871	-0.307298	-0.315629	-0.304126	0.0234098	-0.39044	-0.0858126	-0.178966	-0.145163	-0.202958	0.545357	-0.0578532
GD3	0.199193	-0.291055	0.955808	0.0369887	0.570394	-0.142405	0.0570582	-0.251939	-0.0769987	-0.225954	-0.016876	-0.404426	0.278767	-0.0303471	-0.00437143	-0.258286	0.299959	-0.0140245
GD4	-0.220554	-0.440552	0.915906	0.0311696	0.326707	-0.203133	-0.182761	-0.182155	-0.0943757	0.210408	-0.27643	0.0303205	0.139205	0.0557275	-0.155841	-0.227472	0.0202616	0.0675856
GD5	-0.248492	-0.12571	0.886906	-0.0128333	0.463686	-0.00999095	-0.156404	0.130891					0.20847	0.380867	-0.230441	-0.157644
STDEV	0.207027	0.157719	0.279172	0.0245492	0.182066	0.105298	0.129282	0.173362	0.112275	0.228309	0.13584	0.204714	0.149381	0.209771	0.0870206	0.0532593	0.242204	0.0534584
TTEST	0.277028	0.0986182	0.000996652	0.911315	0.00427191	0.0665751	0.0604106	0.10481	0.100382	0.383602	0.319377	0.0941979	0.251513	0.457769	0.10303	0.0278554	0.115495	0.913078
	ns	ns	***	ns	**	ns	ns	ns	ns	ns	ns	ns	ns	ns	ns	*	ns	ns
