# Supplementary material for: Drosophila hamlet mediates epithelial tissue assembly of the reproductive system
Source: eLife. 2025 Jul 4;13:RP104164. doi: 10.7554/eLife.104164 (PMC12227202; doi:10.7554/eLife.104164)
Supplement: Figure 6—figure supplement 3—source data 3. [file elife-104164-fig6-figsupp3-data3.xlsx]

## Sheet: Figure6-figure supplement 3G
	ham		fz		shg		fz2
	Area	RawIntDen	Area	RawIntDen	Area	RawIntDen	Area	RawIntDen
GFP.RNAi_Te1a	395.518	573455404	395.518	278244318	395.518	638731357	395.518	633245898
GFP.RNAi_Te1b	395.518	579722940	395.518	261688962	395.518	665030552	395.518	629973290
GFP.RNAi_Te2a	395.518	464001197	395.518	224071490	395.518	432817661	395.518	310050162
GFP.RNAi_Te2b	395.518	577133467	395.518	212023998	395.518	393131471	395.518	354913946
GFP.RNAi_Te3a	395.518	380967937	395.518	179243978	395.518	995720250	395.518	556427287
GFP.RNAi_Te3b	395.518	357027016	395.518	216314414	395.518	917083185	395.518	527426073
GFP.RNAi_Te4a					395.518	606266626	395.518	387265568
GFP.RNAi_Te4b					395.518	637826752	395.518	432688995
GFP.RNAi_Te5a					395.518	870231585	395.518	714381151
GFP.RNAi_Te5b					395.518	837034835	395.518	664900587
ham.RNAi_Te1a	395.518	303257320	395.518	154905157	395.518	439156559	395.518	288475273
ham.RNAi_Te1b	395.518	214342425	395.518	139341808	395.518	499213586	395.518	282761046
ham.RNAi_Te2a	395.518	267230789	395.518	171659691	395.518	391034775	395.518	340350305
ham.RNAi_Te2b	395.518	252924405	395.518	158659533	395.518	319921940	395.518	290597020
ham.RNAi_Te3a	395.518	296909061	395.518	118082208	395.518	604380105	395.518	366237166
ham.RNAi_Te3b	395.518	251798846	395.518	118762573	395.518	524080155	395.518	361864623
ham.RNAi_Te4a					395.518	273274527	395.518	198515256
ham.RNAi_Te4b					395.518	262186777	395.518	172836535
ham.RNAi_Te5a					395.518	322673074	395.518	203571131
ham.RNAi_Te5b					395.518	310569993	395.518	191230329
TE_relative signal changes (ham.RNAi vs GFP.RNAi)
	ham	fz	shg	fz2
TE1	-0.470452	-0.356409	-0.329149	-0.451922
TE2	-0.467837	-0.27751	-0.491729	-0.394632
TE3	-0.438625	-0.481962	-0.193251	-0.301417
TE4			-0.617193	-0.643703
TE5			-0.547287	-0.621204
STDEV	0.0176686	0.103109	0.172239	0.147201
TTEST	0.0226399	0.028778	0.023465	0.0100372
	*	*	*	*
