# Supplementary material for: Drosophila hamlet mediates epithelial tissue assembly of the reproductive system
Source: eLife. 2025 Jul 4;13:RP104164. doi: 10.7554/eLife.104164 (PMC12227202; doi:10.7554/eLife.104164)
Supplement: Figure 6—source data 1. [file elife-104164-fig6-data1.xlsx]

## Sheet: Figure 6C
	Wnt2		fz2		fz3		fz		fz4		shg		spz
	Area	RawIntDen	Area	RawIntDen	Area	RawIntDen	Area	RawIntDen	Area	RawIntDen	Area	RawIntDen	Area	RawIntDen
w/Df_GD1_SVa	925.156	314063564	925.156	618582923	925.156	26856821	925.156	194304738	925.156	185369788	925.156	362388927	925.157	78706802
w/Df_GD1_SVb	925.156	282996104	925.156	671122950	925.156	38461007	925.156	258681030	925.156	196336830	925.156	512809112	925.157	123235269
w/Df_GD1_EjD a	299.773	56653980	299.773	57187895	299.773	303171128	299.773	121862422	299.773	91507668	299.773	203740884	299.773	13641405
w/Df_GD1_EjD b	299.773	83894501	299.773	64565091	299.773	269771341	299.773	131264485	299.773	82175721	299.773	236613210	299.773	14259704
w/Df_GD2_SVa	925.156	328537159	925.156	747855142	925.156	32824242	925.156	189743490	925.156	160638738	925.156	607297734	925.156	312240143
w/Df_GD2_SVb	925.156	360888026	925.156	669172579	925.156	40623006	925.156	244146811	925.156	217925438	925.156	363030928	925.156	200684530
w/Df_GD2_EjD a	299.773	57326703	299.773	50543336	299.773	238164090	299.773	93155665	299.773	58032973	299.773	169854223	299.773	15294655
w/Df_GD2_EjD b	299.773	46382606	299.773	54792036	299.773	287027748	299.773	92225772	299.773	72867272	299.773	171805399	299.773	16426736
w/Df_GD3_SVa	925.156	340408889	925.156	806752117	925.156	47543898	925.156	215984666	925.156	174349608	925.156	364897371	925.156	269452537
w/Df_GD3_SVb	925.156	227161899	925.156	755394592	925.156	27827233	925.156	223353130	925.156	191850212	925.156	571205294	925.156	314881964
w/Df_GD3_EjD a	299.773	46631638	299.773	81833957	299.773	253627013	299.773	119953971	299.773	57582719	299.773	158889098	299.773	17338876
w/Df_GD3_EjD b	299.773	35681891	299.773	45526149	299.773	256129111	299.773	120504229	299.773	58638120	299.773	134777233	299.773	20479909
w/Df_GD4_SVa	925.156	354938621	925.156	652656875	925.156	25716361	925.156	154754499	925.156	193031044
w/Df_GD4_SVb	925.156	412690720	925.156	771072076	925.156	43315633	925.156	193337354	925.156	240855081
w/Df_GD4_EjD a	299.773	37121932	299.773	96155493	299.773	100833348	299.773	96466790	299.773	92279117
w/Df_GD4_EjD b	299.773	30809278	299.773	95161817	299.773	119861965	299.773	128748332	299.773	92132166
sk1/Df_GD1_SVa	925.156	43975802	925.156	170241450	925.156	17101888	925.156	124949350	925.156	70487193	925.156	145900362	925.157	33355364
sk1/Df_GD1_SVb	925.156	54830221	925.156	216919790	925.156	19000935	925.156	135908724	925.156	80540589	925.156	109496292	925.157	33443425
sk1/Df_GD1_EjD a	299.773	23480171	299.773	19537495	299.773	50146599	299.773	41483012	299.773	27429261	299.773	53800574	299.773	8525641
sk1/Df_GD1_EjD b	299.773	23912213	299.773	20642867	299.773	49144468	299.773	52621611	299.773	20972578	299.773	50409872	299.773	9807689
sk1/Df_GD2_SVa	925.156	64615178	925.156	226521597	925.156	25031043	925.156	166998150	925.156	128441088	925.156	177291242	925.157	52595220
sk1/Df_GD2_SVb	925.156	58586420	925.156	191371447	925.156	33749376	925.156	144174437	925.156	111206975	925.156	232741553	925.157	58752621
sk1/Df_GD2_EjD a	299.773	20384756	299.773	21365957	299.773	45645182	299.773	54891968	299.773	32366943	299.773	61590647	299.773	13903810
sk1/Df_GD2_EjD b	299.773	19523148	299.773	17273431	299.773	51984480	299.773	56591063	299.773	40795411	299.773	69412954	299.773	13051855
sk1/Df_GD3_SVa	925.156	74351844	925.156	263907322	925.156	49925234	925.156	170977089	925.156	154890043	925.156	211296338	925.157	58946450
sk1/Df_GD3_SVb	925.156	54125477	925.156	204776378	925.156	42567238	925.156	150728849	925.156	116134186	925.156	217079358	925.157	25473249
sk1/Df_GD3_EjD a	299.773	28359604	299.773	36496814	299.773	91201331	299.773	64366866	299.773	56414651	299.773	98420672	299.773	9610556
sk1/Df_GD3_EjD b	299.773	28001513	299.773	26106965	299.773	98217325	299.773	71173806	299.773	51568477	299.773	110846825	299.773	11506497
sk1/Df_GD4_SVa	925.156	70380539	925.156	140833014	925.156	66630052	925.156	186366197	925.156	144636059
sk1/Df_GD4_SVb	925.156	79082071	925.156	215530663	925.156	41366087	925.156	193364127	925.156	129116657
sk1/Df_GD4_EjD a	299.773	40130934	299.773	30645332	299.773	101114805	299.773	55865602	299.773	44938350
sk1/Df_GD4_EjD b	299.773	40533325	299.773	31786962	299.773	114550176	299.773	64058666	299.773	30495352
GD_relative signal changes (hamSk1/Df vs w/Df)
	Wnt2		fz2		fz3		fz		fz4		shg		spz
	SV	EjD	SV	EjD	SV	EjD	SV	EjD	SV	EjD	SV	EjD	SV	EjD
GD1	-0.849248	-0.519472	-0.727955	-0.705512	-0.490016	-0.782802	-0.376797	-0.583692	-0.612838	-0.680102	-0.724554	-0.709364	-0.845754	-0.435558
GD2	-0.812027	-0.59536	-0.706361	-0.716806	-0.169675	-0.786437	-0.256593	-0.506811	-0.385658	-0.516454	-0.557778	-0.63464	-0.742885	-0.170095
GD3	-0.803977	-0.428535	-0.670672	-0.541167	0.306538	-0.58565	-0.231428	-0.400383	-0.305225	-0.286316	-0.537995	-0.416367	-0.805066	-0.349853
GD4	-0.771959	-0.182117	-0.749596	-0.542424	0.52554	-0.528237	-0.0928053	-0.469468	-0.29823	-0.501443
STDEV	0.0317591	0.17962	0.0336499	0.0978919	0.458851	0.133531	0.116515	0.0764056	0.147019	0.161564	0.102477	0.152247	0.0518072	0.13548
TTEST	2.7897e-05	0.0570597	2.87716e-06	0.00527243	0.858529	0.0116012	0.0259899	0.000633415	0.00291307	0.0105335	0.000792964	0.0170208	0.0429899	0.0546865
	***	ns	***	**	ns	*	*	***	**	*	***	*	*	ns
