# Supplementary material for: Drosophila hamlet mediates epithelial tissue assembly of the reproductive system
Source: eLife. 2025 Jul 4;13:RP104164. doi: 10.7554/eLife.104164 (PMC12227202; doi:10.7554/eLife.104164)
Supplement: Figure 6—source data 2. [file elife-104164-fig6-data2.xlsx]

## Sheet: Figure 6E
	ham		spz		Wnt2		shg		fz
	Area	RawIntDen	Area	RawIntDen	Area	RawIntDen	Area	RawIntDen	Area	RawIntDen
GFP.RNAi_GD1_SVa	925.156	245113067	925.156	263107338	925.156	233979672	925.156	355158982	925.156	217979291
GFP.RNAi_GD1_SVb	925.156	258196378	925.156	525242763	925.156	229032904	925.156	491974582	925.156	175373290
GFP.RNAi_GD1_EjD a	299.773	26197888	299.773	21651057	299.773	19313417	299.773	101094863	299.773	107812060
GFP.RNAi_GD1_EjD b	299.773	20355670	299.773	18780041	299.773	19362428	299.773	111658464	299.773	84941868
GFP.RNAi_GD2_SVa	925.156	230890905	925.156	280608140	925.156	207222494	925.156	443395016	925.156	267114260
GFP.RNAi_GD2_SVb	925.156	210543229	925.156	393246008	925.156	246997133	925.156	513102411	925.156	240333904
GFP.RNAi_GD2_EjD a	299.773	32795199	299.773	25036433	299.773	19170575	299.773	127857507	299.773	114709225
GFP.RNAi_GD2_EjD b	299.773	37136378	299.773	25706603	299.773	17651757	299.773	137655843	299.773	112208035
GFP.RNAi_GD3_SVa	925.156	230424180	925.156	423838342	925.156	224998805	925.156	475513422	925.156	212288239
GFP.RNAi_GD3_SVb	925.156	236256409	925.156	337111972	925.156	254195306	925.156	525346667	925.156	166492538
GFP.RNAi_GD3_EjD a	299.773	37574760	299.773	22368123	299.773	19686999	299.773	95886321	299.773	109782335
GFP.RNAi_GD3_EjD b	299.773	28782010	299.773	20496729	299.773	19739207	299.773	128991972	299.773	106009066
GFP.RNAi_GD4_SVa	925.156	248034065	925.156	375505164	925.156	334194138			925.156	234107899
GFP.RNAi_GD4_SVb	925.156	212343037	925.156	436517016	925.156	250745835			925.156	204783676
GFP.RNAi_GD4_EjD a	299.773	30662939	299.773	23530618	299.773	21513777			299.773	88777201
GFP.RNAi_GD4_EjD b	299.773	29213607	299.773	21650620	299.773	22883149			299.773	95527788
ham.RNAi_GD1_SVa	925.156	297867337	925.156	86591535	925.156	201896696	925.156	323105618	925.156	147294188
ham.RNAi_GD1_SVb	925.156	268983752	925.156	63767154	925.156	163924398	925.156	256303854	925.156	125666190
ham.RNAi_GD1_EjD a	299.773	26333343	299.773	14897042	299.773	22677644	299.773	81927738	299.773	90023376
ham.RNAi_GD1_EjD b	299.773	23496522	299.773	15832215	299.773	23529306	299.773	77486421	299.773	95907035
ham.RNAi_GD2_SVa	925.156	218254326	925.156	100459638	925.156	190268131	925.156	353935429	925.156	161132682
ham.RNAi_GD2_SVb	925.156	199977159	925.156	93426785	925.156	159949126	925.156	340274820	925.156	162037241
ham.RNAi_GD2_EjD a	299.773	22649761	299.773	14866122	299.773	22590788	299.773	78939720	299.773	81042084
ham.RNAi_GD2_EjD b	299.773	21650241	299.773	14484449	299.773	21218842	299.773	76167500	299.773	75649500
ham.RNAi_GD3_SVa	925.156	269829828	925.156	91869941	925.156	154025986	925.156	385252054	925.156	159398370
ham.RNAi_GD3_SVb	925.156	279827381	925.156	81920610	925.156	204451186	925.156	350384469	925.156	143012206
ham.RNAi_GD3_EjD a	299.773	23522981	299.773	10477139	299.773	18993218	299.773	99420221	299.773	89579808
ham.RNAi_GD3_EjD b	299.773	20466772	299.773	8951137	299.773	19403469	299.773	87681608	299.773	87782013
ham.RNAi_GD4_SVa	925.156	230834642	925.156	73146854	925.156	209127374			925.156	157224849
ham.RNAi_GD4_SVb	925.156	277435913	925.156	78305847	925.156	214297964			925.156	163830588
ham.RNAi_GD4_EjD a	299.773	21606383	299.773	15774480	299.773	20839028			299.773	96154852
ham.RNAi_GD4_EjD b	299.773	24298984	299.773	15947554	299.773	18517177			299.773	97319896
GD_relative signal changes (ham.RNAi vs GFP.RNAi)
	ham		spz		Wnt2		shg		fz
	SV	EjD	SV	EjD	SV	EjD	SV	EjD	SV	EjD
GD1	0.211349	-0.178804	-0.801845	-0.314156	-0.261477	0.160095	-0.380198	-0.319852	-0.364644	-0.0927652
GD2	-0.106248	-0.269936	-0.744481	-0.344927	-0.292978	0.0999064	-0.257394	-0.338228	-0.247774	-0.235434
GD3	0.174606	-0.275049	-0.770965	-0.566382	-0.276303	-0.0359937	-0.21308	-0.201722	-0.296095	-0.134575
GD4	0.0861635	-0.24348	-0.800403	-0.291999	-0.145185	-0.0119035			-0.252696	-0.0559532
STDEV	0.141896	0.0442284	0.0272973	0.126552	0.0671123	0.0927394	0.0865765	0.0740794	0.0541084	0.0774731
TTEST	0.274975	0.0329342	1.58906e-06	0.00321366	0.0128875	0.422683	0.0153929	0.0234798	0.00711634	0.0810429
	ns	*	***	**	*	ns	*	*	**	ns
