# Supplementary material for: Drosophila hamlet mediates epithelial tissue assembly of the reproductive system
Source: eLife. 2025 Jul 4;13:RP104164. doi: 10.7554/eLife.104164 (PMC12227202; doi:10.7554/eLife.104164)
Supplement: Figure 7—figure supplement 1—source data 1. [file elife-104164-fig7-figsupp1-data1.xlsx]

## Sheet: Figure7-figure supplement 1A
		replicates	1	2	3	STDEV	TTEST
stock number	BL 9330	GFP.RNAi	17	14	17	1.73205
	BL 34853	Tl-9_RNAi	1	0	2	1	0.000202627	***
BL: Bloomington Drosophila Stock Center
