# Supplementary material for: Drosophila hamlet mediates epithelial tissue assembly of the reproductive system
Source: eLife. 2025 Jul 4;13:RP104164. doi: 10.7554/eLife.104164 (PMC12227202; doi:10.7554/eLife.104164)
Supplement: Figure 7—source data 1. [file elife-104164-fig7-data1.xlsx]

## Sheet: Figure 7D
		replicates	1	2	3	STDEV	TTEST
stock nomber	BL 9330	GFP.RNAi	17	14	17	1.73205
	BL 27568	fz2.RNAi_1	11	8	8	1.73205	0.0077626	**
	BL 67863	fz2.RNAi_2	3	11	0	5.68624	0.029867	*
	VDRC 43075	fz.RNAi	7	1	10	4.58258	0.0241101	*
BL: Bloomington Drosophila Stock Center
VDRC: Vienna Drosophila Resource Center
